# Supplementary material for: Novel quadridentate salen type triple-decker sandwich ytterbium complexes with near infrared luminescence
Source: Royal Society of Chemistry journal article supplement (doi:10.1039/c0ce00553c), 2010-10-26
Supplement: c0ce00553c.pdf [file c0ce00553c.pdf]

# Novel Quadridentate Salen Type Triple-decker Sandwich Ytterbium Complexes with Near Infrared Luminescence

Peng-Fei Yan, Shuo Chen, Peng Chen, Ju-Wen Zhang, Guang-Ming Li\*

Key Laboratory of Functional Inorganic Material Chemistry (MOE); School of Chemistry and Materials Science, Heilongjiang University; No. 74, Xuefu Road, Nangang District, Harbin 150080, P. R. China. E-mail: gml\_i\_2000@163.com; Fax: +86 451 86604799; Tel: +86 451 86608428;

## § Electronic supplementary information (ESI):

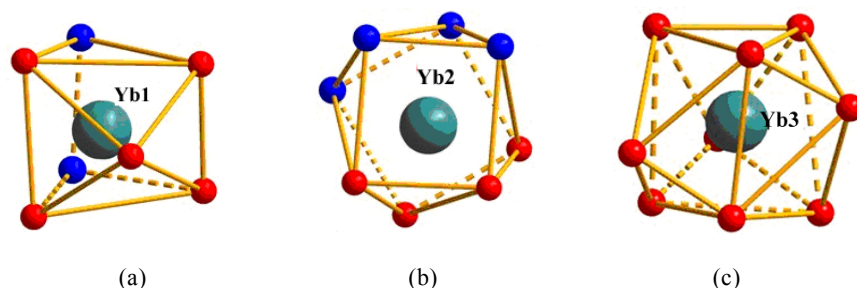

Figure S1. Coordination geometries of Yb(III) ions in **1** and **2**. (a) seven-coordinated geometry of mono-capped trigonal prism; (b) eight-coordinated geometry of square antiprism; (c) nine-coordinated geometry of tri-capped trigonal prism).

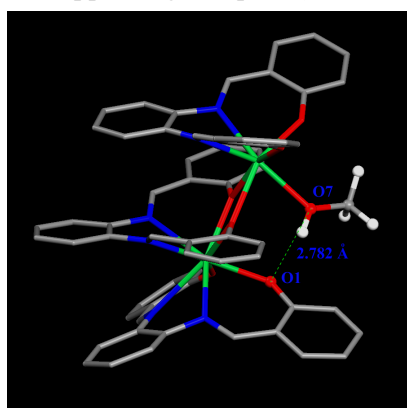

Figure S2. Intramolecular H-bonding between the CH<sub>3</sub>OH group and the ligand in **1**.

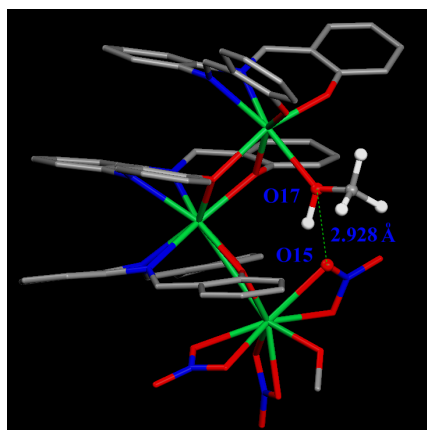

Figure S3. Intramolecular H-bonding between the CH<sub>3</sub>OH group and the nitrate group in **2**.

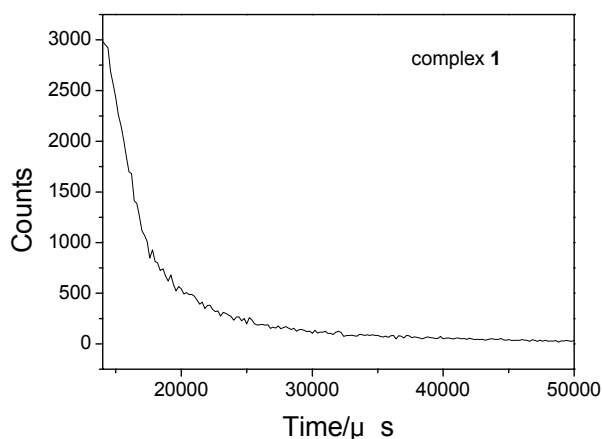

Figure S4. The decay curves of excited states in single exponential way for lifetime values of **1** in CH<sub>3</sub>OH at room temperature.

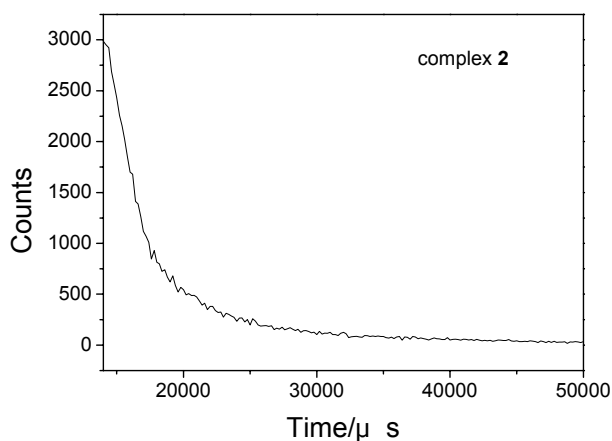

Figure S5. The decay curves of excited states in single exponential way for lifetime values of **2** in CH<sub>3</sub>OH at room temperature.

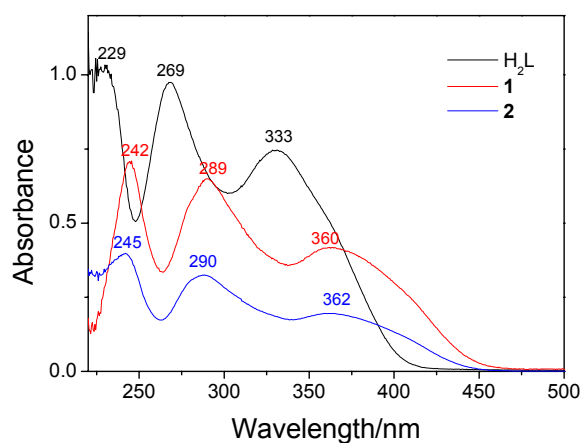

Figure S6. UV-Vis spectra of free H<sub>2</sub>L and complexes **1** and **2** in CH<sub>3</sub>OH (1×10<sup>-5</sup> M). The photophysical properties of complexes **1** and **2** were studied in CH<sub>3</sub>OH. The free ligand (H<sub>2</sub>L) exhibits absorption bands at 229, 269 and 333 nm, which become red-shifted upon coordination to the metals in **1** and **2**.

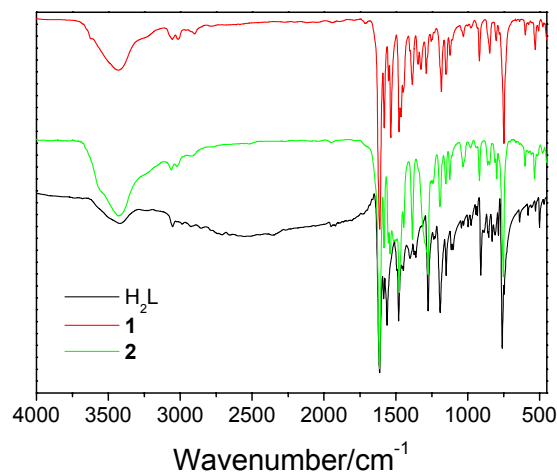

Figure S7. Infrared spectra of complexes **1**, **2** and H<sub>2</sub>L recorded from a KBr pellet. IR (KBr, cm<sup>-1</sup>) for **1**: 3429(s), 1612(s), 1581(m), 1535(m), 1477(m), 1464(m), 1403(m), 1289(s), 1183(m), 1027(m), 919(w), 749(s), 530(m). IR (KBr, cm<sup>-1</sup>) for **2**: 3428(s), 1614(s), 1582(m), 1552(m), 1540(m), 1476(s), 1385(m), 1277(s), 1193(m), 918(m), 798(m), 752(s), 536(m).

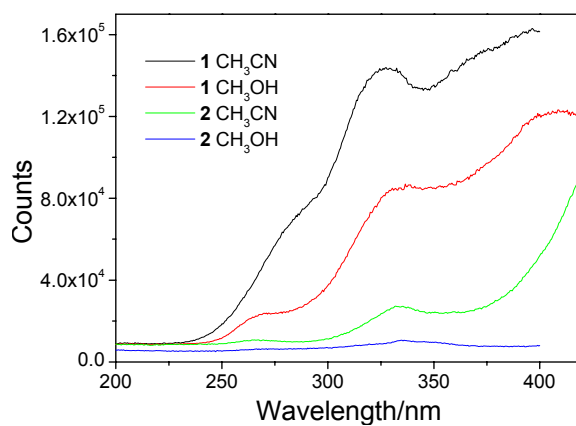

Figure S8. NIR excitation spectra of complexes **1** and **2** in CH<sub>3</sub>CN and CH<sub>3</sub>OH.
